# Supplementary material for: TRK Fusions Are Enriched in Cancers with Uncommon Histologies and the Absence of Canonical Driver Mutations
Source: Oxford University Press journal article supplement (doi:10.1158/1078-0432.ccr-19-3165), 2019-12-23
Supplement: 10780432ccr193165-sup-229699_2_supp_5953124_q2cqc7.xlsx [file 10780432ccr193165-sup-229699_2_supp_5953124_q2cqc7.xlsx]

## Sheet: Sheet1
Endpoint	Estimate	95% Confidence Interval
Median RFS, years (n=39)	3.45 years	[2.39 - 4.95]
RFS Annual Estimate, %
1-Year	0.949	[81.0 - 98.7]
3-Year	0.564	[36.8 - 72.1]
5-Year	0.301	[14.5 - 47.4]
10-Year	0.056	[0.5 - 20.9]
Median PFS, years (n=51)	0.76 years	[0.39 – 1.09]
PFS Annual Estimate, %
1-Year	0.373	[24.1 - 50.6]
3-Year	0.228	[11.9 - 35.9]
5-Year	0.038	[0.3 - 15.8]
Median OS, years (n=76)	19.82	[9.12 – NR]
OS Annual Estimate, %
1-Year	0.946	[86.1 - 97.9]
3-Year	0.831	[70.4 - 90.7]
5-Year	0.713	[56.4 - 82.0]
10-Year	0.598	[42.0 - 73.7]
RFS, relapse-free survival; PFS, progression-free survival; OS, overall survival; NR, not reached
